# Supplementary material for: Adjuvant Oral Uracil-Tegafur with Leucovorin for Colorectal Cancer Liver Metastases: A Randomized Controlled Trial
Source: PLOS journal article supplement (doi:10.1371/journal.pone.0162400), 2016-09-02
Supplement: S3 (10.1371/journal.pone.0162400.s003) [file journal.pone.0162400.s003]

List of Modifications of the Protocol for "Study of the Efficacy of Post-Hepatectomy Adjuvant Chemotherapy in Colorectal Cancer Patients with Liver Metastasis" (8th version)

| No.          | Page                                                                                                                                                                                                                                                                                                                                                                            | Part                                                                 | Before modification                                                                                                                                                                                                                                                                                                                                                                                                                                                                                                                                                                                                                                                                                                                                                                                                                                                                                                                                                                                                                                                                                                                                                | After modification                                                                                                                                                                                                                                                                                                                                                                                                                                                                                                                                                                                                                                                                                                                                                                                                                                                                                                                                                                                                                                                                                                                                                                                                                                                                                                                                                                                            | Date of modification            |             |                                                                                                                                                                                                                                                                                    |              |              |        |                                    |              |                 |                                                                                                                                                                                                                                                                                                                                                                                                                                                                                                                                                                                                                                                                                                                                                                                            |        |       |             |                                                                                                                                                                                                                                                                                                                                                                                 |              |              |        |                                    |              |                 |             |                     |                                 |
|--------------|---------------------------------------------------------------------------------------------------------------------------------------------------------------------------------------------------------------------------------------------------------------------------------------------------------------------------------------------------------------------------------|----------------------------------------------------------------------|--------------------------------------------------------------------------------------------------------------------------------------------------------------------------------------------------------------------------------------------------------------------------------------------------------------------------------------------------------------------------------------------------------------------------------------------------------------------------------------------------------------------------------------------------------------------------------------------------------------------------------------------------------------------------------------------------------------------------------------------------------------------------------------------------------------------------------------------------------------------------------------------------------------------------------------------------------------------------------------------------------------------------------------------------------------------------------------------------------------------------------------------------------------------|---------------------------------------------------------------------------------------------------------------------------------------------------------------------------------------------------------------------------------------------------------------------------------------------------------------------------------------------------------------------------------------------------------------------------------------------------------------------------------------------------------------------------------------------------------------------------------------------------------------------------------------------------------------------------------------------------------------------------------------------------------------------------------------------------------------------------------------------------------------------------------------------------------------------------------------------------------------------------------------------------------------------------------------------------------------------------------------------------------------------------------------------------------------------------------------------------------------------------------------------------------------------------------------------------------------------------------------------------------------------------------------------------------------|---------------------------------|-------------|------------------------------------------------------------------------------------------------------------------------------------------------------------------------------------------------------------------------------------------------------------------------------------|--------------|--------------|--------|------------------------------------|--------------|-----------------|--------------------------------------------------------------------------------------------------------------------------------------------------------------------------------------------------------------------------------------------------------------------------------------------------------------------------------------------------------------------------------------------------------------------------------------------------------------------------------------------------------------------------------------------------------------------------------------------------------------------------------------------------------------------------------------------------------------------------------------------------------------------------------------------|--------|-------|-------------|---------------------------------------------------------------------------------------------------------------------------------------------------------------------------------------------------------------------------------------------------------------------------------------------------------------------------------------------------------------------------------|--------------|--------------|--------|------------------------------------|--------------|-----------------|-------------|---------------------|---------------------------------|
| 1            | p.i<br>p.5                                                                                                                                                                                                                                                                                                                                                                      | 0.3. Inclusion criteria<br>4.1. Inclusion criteria                   | <p>3) Patient undergoing treatment of liver metastasis for the first time. The liver metastasis may be synchronous or metachronous, but the period from resection of the primary tumor to diagnosis of the liver metastasis may not exceed 12 months.</p> <p>6) Age between 20 and 75 years old on the day of registration</p>                                                                                                                                                                                                                                                                                                                                                                                                                                                                                                                                                                                                                                                                                                                                                                                                                                     | <p>3) Patients undergoing treatment for liver metastasis for the first time or who have undergone hepatectomy once before. The liver metastasis may be synchronous or metachronous, but the period from resection of the primary tumor to diagnosis of the liver metastasis may not exceed 12 months. Patients undergoing hepatectomy for the second time shall be eligible only if they were not registered for this study at the time of the first hepatectomy.</p> <p>*There is no restriction depending on whether the first hepatectomy was carried out at own study center or at another facility, the period from the first resection of liver metastasis to the second hepatectomy, or the presence/absence of adjuvant chemotherapy. However, Criterion 5) of Section 0.3. needs to be satisfied.</p> <p>6) Age between 20 and 80 years old on the day of registration</p>                                                                                                                                                                                                                                                                                                                                                                                                                                                                                                                           |                                 |             |                                                                                                                                                                                                                                                                                    |              |              |        |                                    |              |                 |                                                                                                                                                                                                                                                                                                                                                                                                                                                                                                                                                                                                                                                                                                                                                                                            |        |       |             |                                                                                                                                                                                                                                                                                                                                                                                 |              |              |        |                                    |              |                 |             |                     |                                 |
| 2            | p.12                                                                                                                                                                                                                                                                                                                                                                            | 6.9. Methods of registration and allocation                          | <table border="1"> <thead> <tr> <th>Factor</th> <th>Level</th> </tr> </thead> <tbody> <tr> <td>Institution</td> <td>University of Tokyo, Cancer Institute Hospital of JFCR, NTT Medical Center Tokyo, Toranomon Hospital, Sempo Tokyo<br/>Takanawa Hospital, Showa General Hospital, Yokohama Seamen's Insurance Hospital, Social Insurance Chuo General Hospital, Tokyo<br/>Metropolitan Hiroo Hospital</td> </tr> <tr> <td>Primary site</td> <td>colon/rectum</td> </tr> <tr> <td>Timing</td> <td>synchronous (DFI&lt;1yr)/metachronous</td> </tr> <tr> <td>No. of Tumor</td> <td>single/multiple</td> </tr> </tbody> </table>                                                                                                                                                                                                                                                                                                                                                                                                                                                                                                                                   | Factor                                                                                                                                                                                                                                                                                                                                                                                                                                                                                                                                                                                                                                                                                                                                                                                                                                                                                                                                                                                                                                                                                                                                                                                                                                                                                                                                                                                                        | Level                           | Institution | University of Tokyo, Cancer Institute Hospital of JFCR, NTT Medical Center Tokyo, Toranomon Hospital, Sempo Tokyo<br>Takanawa Hospital, Showa General Hospital, Yokohama Seamen's Insurance Hospital, Social Insurance Chuo General Hospital, Tokyo<br>Metropolitan Hiroo Hospital | Primary site | colon/rectum | Timing | synchronous (DFI<1yr)/metachronous | No. of Tumor | single/multiple | <table border="1"> <thead> <tr> <th>Factor</th> <th>Level</th> </tr> </thead> <tbody> <tr> <td>Institution</td> <td>University of Tokyo, Cancer Institute Hospital of JFCR, NTT Medical Center Tokyo, Toranomon Hospital, Sempo Tokyo<br/>Takanawa Hospital, Showa General Hospital, Yokohama Seamen's Insurance Hospital, Social Insurance Chuo General Hospital, Tokyo<br/>Metropolitan Hiroo Hospital, <b>Nihon University, Juntendo University, Shinshu University, JR Tokyo General Hospital</b></td> </tr> <tr> <td>Primary site</td> <td>colon/rectum</td> </tr> <tr> <td>Timing</td> <td>synchronous (DFI&lt;1yr)/metachronous</td> </tr> <tr> <td>No. of Tumor</td> <td>single/multiple</td> </tr> <tr> <td>Hepatectomy</td> <td><b>first/second</b></td> </tr> </tbody> </table> | Factor | Level | Institution | University of Tokyo, Cancer Institute Hospital of JFCR, NTT Medical Center Tokyo, Toranomon Hospital, Sempo Tokyo<br>Takanawa Hospital, Showa General Hospital, Yokohama Seamen's Insurance Hospital, Social Insurance Chuo General Hospital, Tokyo<br>Metropolitan Hiroo Hospital, <b>Nihon University, Juntendo University, Shinshu University, JR Tokyo General Hospital</b> | Primary site | colon/rectum | Timing | synchronous (DFI<1yr)/metachronous | No. of Tumor | single/multiple | Hepatectomy | <b>first/second</b> | April 14, 2005<br>(3th version) |
| Factor       | Level                                                                                                                                                                                                                                                                                                                                                                           |                                                                      |                                                                                                                                                                                                                                                                                                                                                                                                                                                                                                                                                                                                                                                                                                                                                                                                                                                                                                                                                                                                                                                                                                                                                                    |                                                                                                                                                                                                                                                                                                                                                                                                                                                                                                                                                                                                                                                                                                                                                                                                                                                                                                                                                                                                                                                                                                                                                                                                                                                                                                                                                                                                               |                                 |             |                                                                                                                                                                                                                                                                                    |              |              |        |                                    |              |                 |                                                                                                                                                                                                                                                                                                                                                                                                                                                                                                                                                                                                                                                                                                                                                                                            |        |       |             |                                                                                                                                                                                                                                                                                                                                                                                 |              |              |        |                                    |              |                 |             |                     |                                 |
| Institution  | University of Tokyo, Cancer Institute Hospital of JFCR, NTT Medical Center Tokyo, Toranomon Hospital, Sempo Tokyo<br>Takanawa Hospital, Showa General Hospital, Yokohama Seamen's Insurance Hospital, Social Insurance Chuo General Hospital, Tokyo<br>Metropolitan Hiroo Hospital                                                                                              |                                                                      |                                                                                                                                                                                                                                                                                                                                                                                                                                                                                                                                                                                                                                                                                                                                                                                                                                                                                                                                                                                                                                                                                                                                                                    |                                                                                                                                                                                                                                                                                                                                                                                                                                                                                                                                                                                                                                                                                                                                                                                                                                                                                                                                                                                                                                                                                                                                                                                                                                                                                                                                                                                                               |                                 |             |                                                                                                                                                                                                                                                                                    |              |              |        |                                    |              |                 |                                                                                                                                                                                                                                                                                                                                                                                                                                                                                                                                                                                                                                                                                                                                                                                            |        |       |             |                                                                                                                                                                                                                                                                                                                                                                                 |              |              |        |                                    |              |                 |             |                     |                                 |
| Primary site | colon/rectum                                                                                                                                                                                                                                                                                                                                                                    |                                                                      |                                                                                                                                                                                                                                                                                                                                                                                                                                                                                                                                                                                                                                                                                                                                                                                                                                                                                                                                                                                                                                                                                                                                                                    |                                                                                                                                                                                                                                                                                                                                                                                                                                                                                                                                                                                                                                                                                                                                                                                                                                                                                                                                                                                                                                                                                                                                                                                                                                                                                                                                                                                                               |                                 |             |                                                                                                                                                                                                                                                                                    |              |              |        |                                    |              |                 |                                                                                                                                                                                                                                                                                                                                                                                                                                                                                                                                                                                                                                                                                                                                                                                            |        |       |             |                                                                                                                                                                                                                                                                                                                                                                                 |              |              |        |                                    |              |                 |             |                     |                                 |
| Timing       | synchronous (DFI<1yr)/metachronous                                                                                                                                                                                                                                                                                                                                              |                                                                      |                                                                                                                                                                                                                                                                                                                                                                                                                                                                                                                                                                                                                                                                                                                                                                                                                                                                                                                                                                                                                                                                                                                                                                    |                                                                                                                                                                                                                                                                                                                                                                                                                                                                                                                                                                                                                                                                                                                                                                                                                                                                                                                                                                                                                                                                                                                                                                                                                                                                                                                                                                                                               |                                 |             |                                                                                                                                                                                                                                                                                    |              |              |        |                                    |              |                 |                                                                                                                                                                                                                                                                                                                                                                                                                                                                                                                                                                                                                                                                                                                                                                                            |        |       |             |                                                                                                                                                                                                                                                                                                                                                                                 |              |              |        |                                    |              |                 |             |                     |                                 |
| No. of Tumor | single/multiple                                                                                                                                                                                                                                                                                                                                                                 |                                                                      |                                                                                                                                                                                                                                                                                                                                                                                                                                                                                                                                                                                                                                                                                                                                                                                                                                                                                                                                                                                                                                                                                                                                                                    |                                                                                                                                                                                                                                                                                                                                                                                                                                                                                                                                                                                                                                                                                                                                                                                                                                                                                                                                                                                                                                                                                                                                                                                                                                                                                                                                                                                                               |                                 |             |                                                                                                                                                                                                                                                                                    |              |              |        |                                    |              |                 |                                                                                                                                                                                                                                                                                                                                                                                                                                                                                                                                                                                                                                                                                                                                                                                            |        |       |             |                                                                                                                                                                                                                                                                                                                                                                                 |              |              |        |                                    |              |                 |             |                     |                                 |
| Factor       | Level                                                                                                                                                                                                                                                                                                                                                                           |                                                                      |                                                                                                                                                                                                                                                                                                                                                                                                                                                                                                                                                                                                                                                                                                                                                                                                                                                                                                                                                                                                                                                                                                                                                                    |                                                                                                                                                                                                                                                                                                                                                                                                                                                                                                                                                                                                                                                                                                                                                                                                                                                                                                                                                                                                                                                                                                                                                                                                                                                                                                                                                                                                               |                                 |             |                                                                                                                                                                                                                                                                                    |              |              |        |                                    |              |                 |                                                                                                                                                                                                                                                                                                                                                                                                                                                                                                                                                                                                                                                                                                                                                                                            |        |       |             |                                                                                                                                                                                                                                                                                                                                                                                 |              |              |        |                                    |              |                 |             |                     |                                 |
| Institution  | University of Tokyo, Cancer Institute Hospital of JFCR, NTT Medical Center Tokyo, Toranomon Hospital, Sempo Tokyo<br>Takanawa Hospital, Showa General Hospital, Yokohama Seamen's Insurance Hospital, Social Insurance Chuo General Hospital, Tokyo<br>Metropolitan Hiroo Hospital, <b>Nihon University, Juntendo University, Shinshu University, JR Tokyo General Hospital</b> |                                                                      |                                                                                                                                                                                                                                                                                                                                                                                                                                                                                                                                                                                                                                                                                                                                                                                                                                                                                                                                                                                                                                                                                                                                                                    |                                                                                                                                                                                                                                                                                                                                                                                                                                                                                                                                                                                                                                                                                                                                                                                                                                                                                                                                                                                                                                                                                                                                                                                                                                                                                                                                                                                                               |                                 |             |                                                                                                                                                                                                                                                                                    |              |              |        |                                    |              |                 |                                                                                                                                                                                                                                                                                                                                                                                                                                                                                                                                                                                                                                                                                                                                                                                            |        |       |             |                                                                                                                                                                                                                                                                                                                                                                                 |              |              |        |                                    |              |                 |             |                     |                                 |
| Primary site | colon/rectum                                                                                                                                                                                                                                                                                                                                                                    |                                                                      |                                                                                                                                                                                                                                                                                                                                                                                                                                                                                                                                                                                                                                                                                                                                                                                                                                                                                                                                                                                                                                                                                                                                                                    |                                                                                                                                                                                                                                                                                                                                                                                                                                                                                                                                                                                                                                                                                                                                                                                                                                                                                                                                                                                                                                                                                                                                                                                                                                                                                                                                                                                                               |                                 |             |                                                                                                                                                                                                                                                                                    |              |              |        |                                    |              |                 |                                                                                                                                                                                                                                                                                                                                                                                                                                                                                                                                                                                                                                                                                                                                                                                            |        |       |             |                                                                                                                                                                                                                                                                                                                                                                                 |              |              |        |                                    |              |                 |             |                     |                                 |
| Timing       | synchronous (DFI<1yr)/metachronous                                                                                                                                                                                                                                                                                                                                              |                                                                      |                                                                                                                                                                                                                                                                                                                                                                                                                                                                                                                                                                                                                                                                                                                                                                                                                                                                                                                                                                                                                                                                                                                                                                    |                                                                                                                                                                                                                                                                                                                                                                                                                                                                                                                                                                                                                                                                                                                                                                                                                                                                                                                                                                                                                                                                                                                                                                                                                                                                                                                                                                                                               |                                 |             |                                                                                                                                                                                                                                                                                    |              |              |        |                                    |              |                 |                                                                                                                                                                                                                                                                                                                                                                                                                                                                                                                                                                                                                                                                                                                                                                                            |        |       |             |                                                                                                                                                                                                                                                                                                                                                                                 |              |              |        |                                    |              |                 |             |                     |                                 |
| No. of Tumor | single/multiple                                                                                                                                                                                                                                                                                                                                                                 |                                                                      |                                                                                                                                                                                                                                                                                                                                                                                                                                                                                                                                                                                                                                                                                                                                                                                                                                                                                                                                                                                                                                                                                                                                                                    |                                                                                                                                                                                                                                                                                                                                                                                                                                                                                                                                                                                                                                                                                                                                                                                                                                                                                                                                                                                                                                                                                                                                                                                                                                                                                                                                                                                                               |                                 |             |                                                                                                                                                                                                                                                                                    |              |              |        |                                    |              |                 |                                                                                                                                                                                                                                                                                                                                                                                                                                                                                                                                                                                                                                                                                                                                                                                            |        |       |             |                                                                                                                                                                                                                                                                                                                                                                                 |              |              |        |                                    |              |                 |             |                     |                                 |
| Hepatectomy  | <b>first/second</b>                                                                                                                                                                                                                                                                                                                                                             |                                                                      |                                                                                                                                                                                                                                                                                                                                                                                                                                                                                                                                                                                                                                                                                                                                                                                                                                                                                                                                                                                                                                                                                                                                                                    |                                                                                                                                                                                                                                                                                                                                                                                                                                                                                                                                                                                                                                                                                                                                                                                                                                                                                                                                                                                                                                                                                                                                                                                                                                                                                                                                                                                                               |                                 |             |                                                                                                                                                                                                                                                                                    |              |              |        |                                    |              |                 |                                                                                                                                                                                                                                                                                                                                                                                                                                                                                                                                                                                                                                                                                                                                                                                            |        |       |             |                                                                                                                                                                                                                                                                                                                                                                                 |              |              |        |                                    |              |                 |             |                     |                                 |
| 3            | p.14                                                                                                                                                                                                                                                                                                                                                                            | 7.2. Definition of endpoints                                         | <p>1) Recurrence-free survival: Period from surgery to detection of recurrence. Recurrence in the liver, death from the underlying disease or death from other diseases, whichever occurs the earliest, shall be counted as the event. In the other patients, the day of final confirmation of recurrence shall signal the end of this period. The cumulative recurrence-free survival rate will be calculated by Kaplan-Meier method. Comparison of the recurrence-free survival shall be conducted using the log-rank test. Analysis using the Cox regression model shall be performed in addition.</p> <p>2) Overall survival: Period from surgery to death. Death from underlying disease or death from other disease shall be counted as the event. For survivors and patients for whom the survival/death status is unknown, the last point of time at which survival is confirmed shall signal the end of this period. The cumulative survival rate will be calculated by Kaplan-Meier method. Comparison of the overall survival shall be carried out using the log-rank test. Analysis using the Cox regression model shall be performed in addition.</p> | <p>1) Recurrence-free survival: Period from surgery to detection of recurrence. <b>For patients who have undergone re-hepatectomy, it would be the period from re-hepatectomy to detection of recurrence.</b> Recurrence in the liver, death from the underlying disease or death from other diseases, whichever occurs the earliest, shall be counted as the event. In the other patients, the day of final confirmation of recurrence shall signal the end of this period. The cumulative recurrence-free survival rate will be calculated by Kaplan-Meier method. Comparison of the recurrence-free survival shall be conducted using the log-rank test. Analysis using the Cox regression model shall be performed in addition.</p> <p>2) Overall survival: Period from surgery to death. <b>For patients who have undergone re-hepatectomy, this will be the period from re-hepatectomy to death.</b> Death from underlying disease or death from other disease shall be counted as the event. For survivors and patients for whom the survival/death status is unknown, the last point of time at which survival is confirmed shall signal the end of this period. The cumulative survival rate will be calculated by Kaplan-Meier method. Comparison of the overall survival shall be carried out using the log-rank test. Analysis using the Cox regression model shall be performed in addition.</p> |                                 |             |                                                                                                                                                                                                                                                                                    |              |              |        |                                    |              |                 |                                                                                                                                                                                                                                                                                                                                                                                                                                                                                                                                                                                                                                                                                                                                                                                            |        |       |             |                                                                                                                                                                                                                                                                                                                                                                                 |              |              |        |                                    |              |                 |             |                     |                                 |
| 4            | p.iii<br>p.21                                                                                                                                                                                                                                                                                                                                                                   | 0.6. Planned number of subjects and study period<br>14. Study period | January 1, 2004 to December 31, 2009<br>(End of registration: December 31, 2006)                                                                                                                                                                                                                                                                                                                                                                                                                                                                                                                                                                                                                                                                                                                                                                                                                                                                                                                                                                                                                                                                                   | January 1, 2004 to December 31, 2011<br>(End of registration: December 31, 2008)                                                                                                                                                                                                                                                                                                                                                                                                                                                                                                                                                                                                                                                                                                                                                                                                                                                                                                                                                                                                                                                                                                                                                                                                                                                                                                                              | April 25, 2006<br>(4th version) |             |                                                                                                                                                                                                                                                                                    |              |              |        |                                    |              |                 |                                                                                                                                                                                                                                                                                                                                                                                                                                                                                                                                                                                                                                                                                                                                                                                            |        |       |             |                                                                                                                                                                                                                                                                                                                                                                                 |              |              |        |                                    |              |                 |             |                     |                                 |
| 5            | p.iii<br>p.21                                                                                                                                                                                                                                                                                                                                                                   | 0.6. Planned number of subjects and study period<br>14. Study period | January 1, 2004 to December 31, 2011<br>(End of registration: December 31, 2008)                                                                                                                                                                                                                                                                                                                                                                                                                                                                                                                                                                                                                                                                                                                                                                                                                                                                                                                                                                                                                                                                                   | January 1, 2004 to December 31, 2012<br>(End of registration: December 31, 2009)                                                                                                                                                                                                                                                                                                                                                                                                                                                                                                                                                                                                                                                                                                                                                                                                                                                                                                                                                                                                                                                                                                                                                                                                                                                                                                                              | April 3, 2008<br>(5th version)  |             |                                                                                                                                                                                                                                                                                    |              |              |        |                                    |              |                 |                                                                                                                                                                                                                                                                                                                                                                                                                                                                                                                                                                                                                                                                                                                                                                                            |        |       |             |                                                                                                                                                                                                                                                                                                                                                                                 |              |              |        |                                    |              |                 |             |                     |                                 |
| 6            | p.iii<br>p.21                                                                                                                                                                                                                                                                                                                                                                   | 0.6. Planned number of subjects and study period<br>14. Study period | January 1, 2004 to December 31, 2012<br>(End of registration: December 31, 2009)                                                                                                                                                                                                                                                                                                                                                                                                                                                                                                                                                                                                                                                                                                                                                                                                                                                                                                                                                                                                                                                                                   | January 1, 2004 to December 31, 2013<br>(End of registration: December 31, 2010)                                                                                                                                                                                                                                                                                                                                                                                                                                                                                                                                                                                                                                                                                                                                                                                                                                                                                                                                                                                                                                                                                                                                                                                                                                                                                                                              | May 21 2009<br>(6th version)    |             |                                                                                                                                                                                                                                                                                    |              |              |        |                                    |              |                 |                                                                                                                                                                                                                                                                                                                                                                                                                                                                                                                                                                                                                                                                                                                                                                                            |        |       |             |                                                                                                                                                                                                                                                                                                                                                                                 |              |              |        |                                    |              |                 |             |                     |                                 |
